# Supplementary material
Source: PubMed Central journal article supplement (PMC2705585)
Supplement: 0904818106_0904818106SI.pdf [file 0904818106_0904818106SI.pdf]

# Supporting Information

Gerasimenko et al. 10.1073/pnas.0904818106

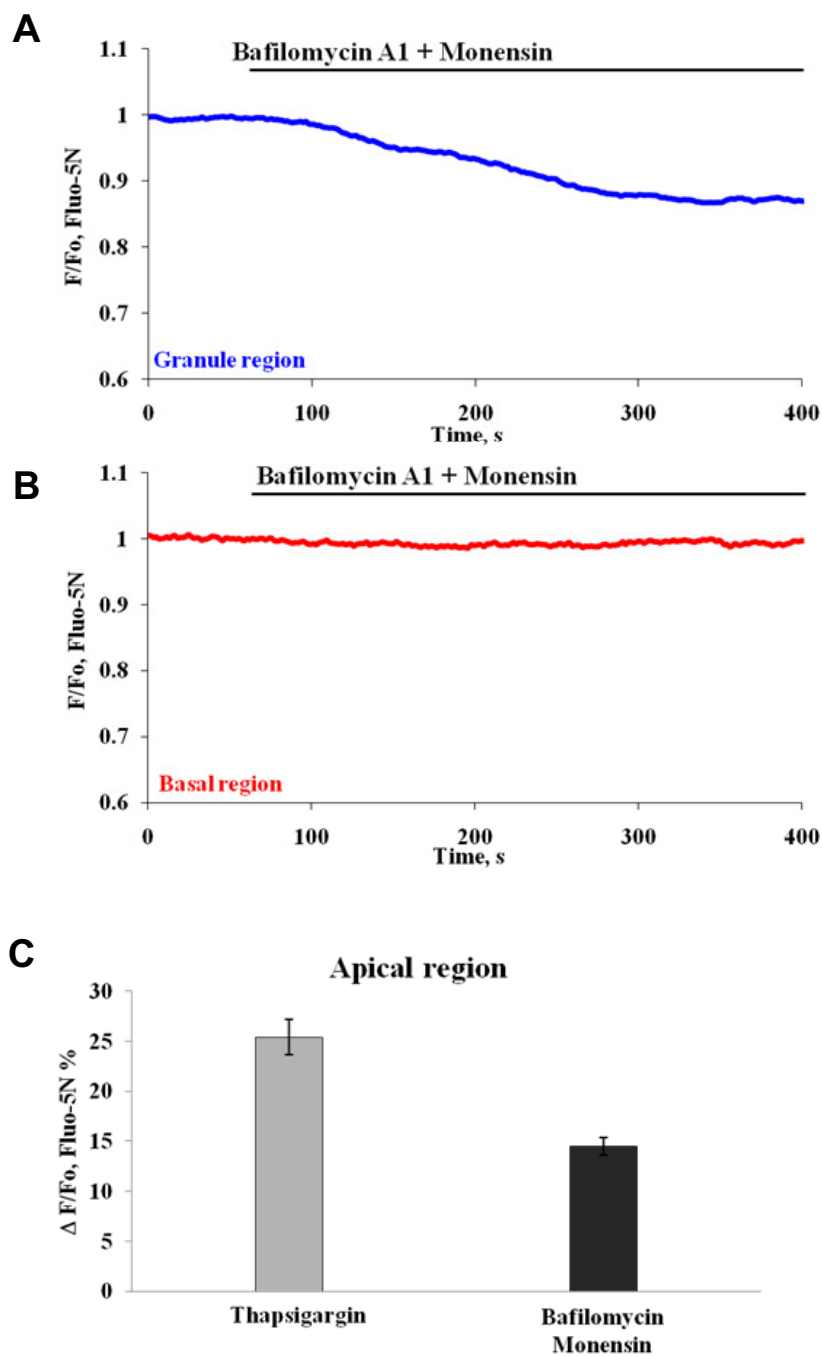

**Fig. S1.** Acid Ca<sup>2+</sup> stores are exclusively present in the apical granular area. Application of bafilomycin A1 (100 nM) and monensin (5 μM) reduced [Ca<sup>2+</sup>]<sub>store</sub> in the apical granular region (A), but not in the basal region (B) of the same cell; (C) compares the amplitudes of the reductions in [Ca<sup>2+</sup>]<sub>store</sub> in the apical granular region evoked by thapsigargin and the bafilomycin/monensin mixture.

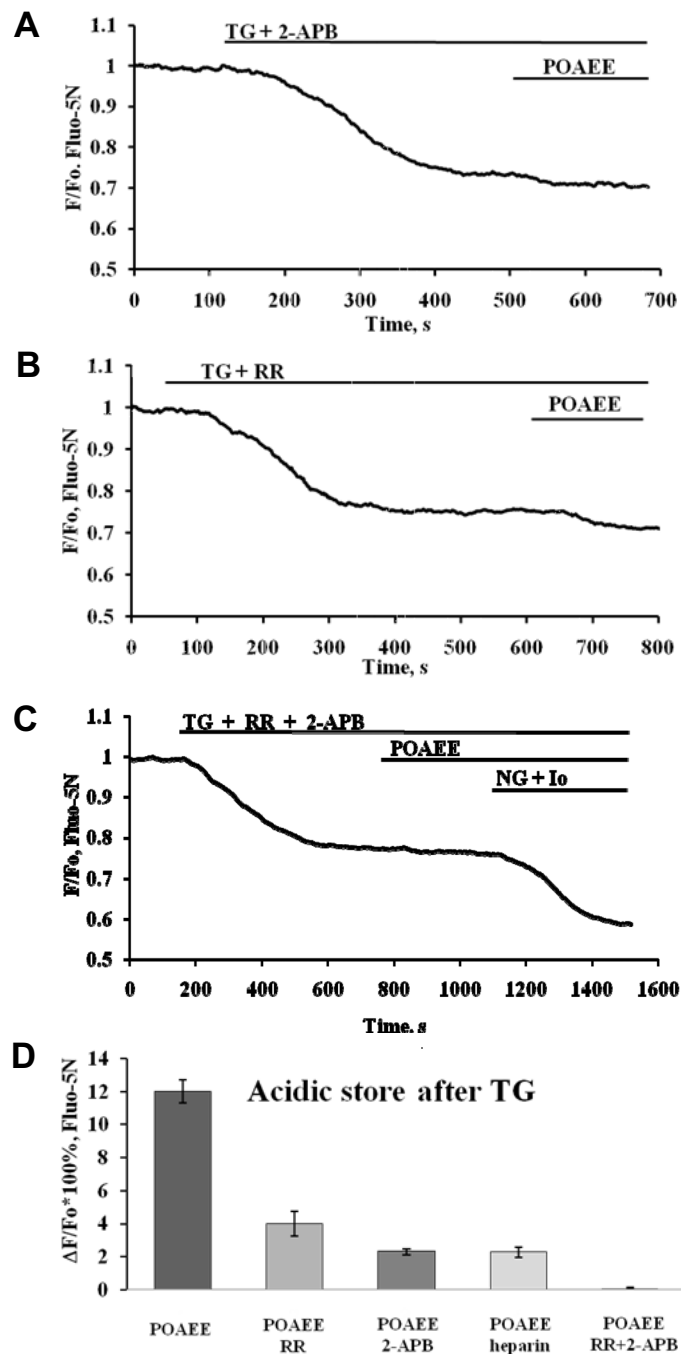

**Fig. S2.** IP<sub>3</sub>R and RyR are responsible for POAEE-induced Ca<sup>2+</sup> release from the acidic stores. (A) When the IP<sub>3</sub>R inhibitor 2-APB (100 μM) was applied together with thapsigargin (10 μM), the subsequent POAEE-induced Ca<sup>2+</sup> release was very small [for quantification and comparison with results obtained without IP<sub>3</sub>R inhibitor, see (D)]. (B) When the RyR inhibitor ruthenium red (RR, 10 μM) was applied together with thapsigargin (10 μM), the subsequent POAEE-induced Ca<sup>2+</sup> release was small [for quantification and comparison with results obtained without RyR inhibitor, see (D)]. (C) When both the IP<sub>3</sub>R (2-APB, 100 μM) and the RyR (RR, 10 μM) inhibitors were applied together with thapsigargin (10 μM), POAEE subsequently failed to elicit any further Ca<sup>2+</sup> release [for quantification and comparison with the results obtained without IP<sub>3</sub>R and RyR inhibitors, see (D)]. However, subsequent addition of nigericin (NG, 10 μM) and ionomycin (Io, 5 μM) elicited a substantial further reduction of [Ca<sup>2+</sup>] in the acidic store. (D) Summary and quantification of the results obtained after TG treatment. Both RR and 2-APB substantially inhibited Ca<sup>2+</sup> release from the acidic stores. When added together they abolished the POAEE-induced Ca<sup>2+</sup> release.

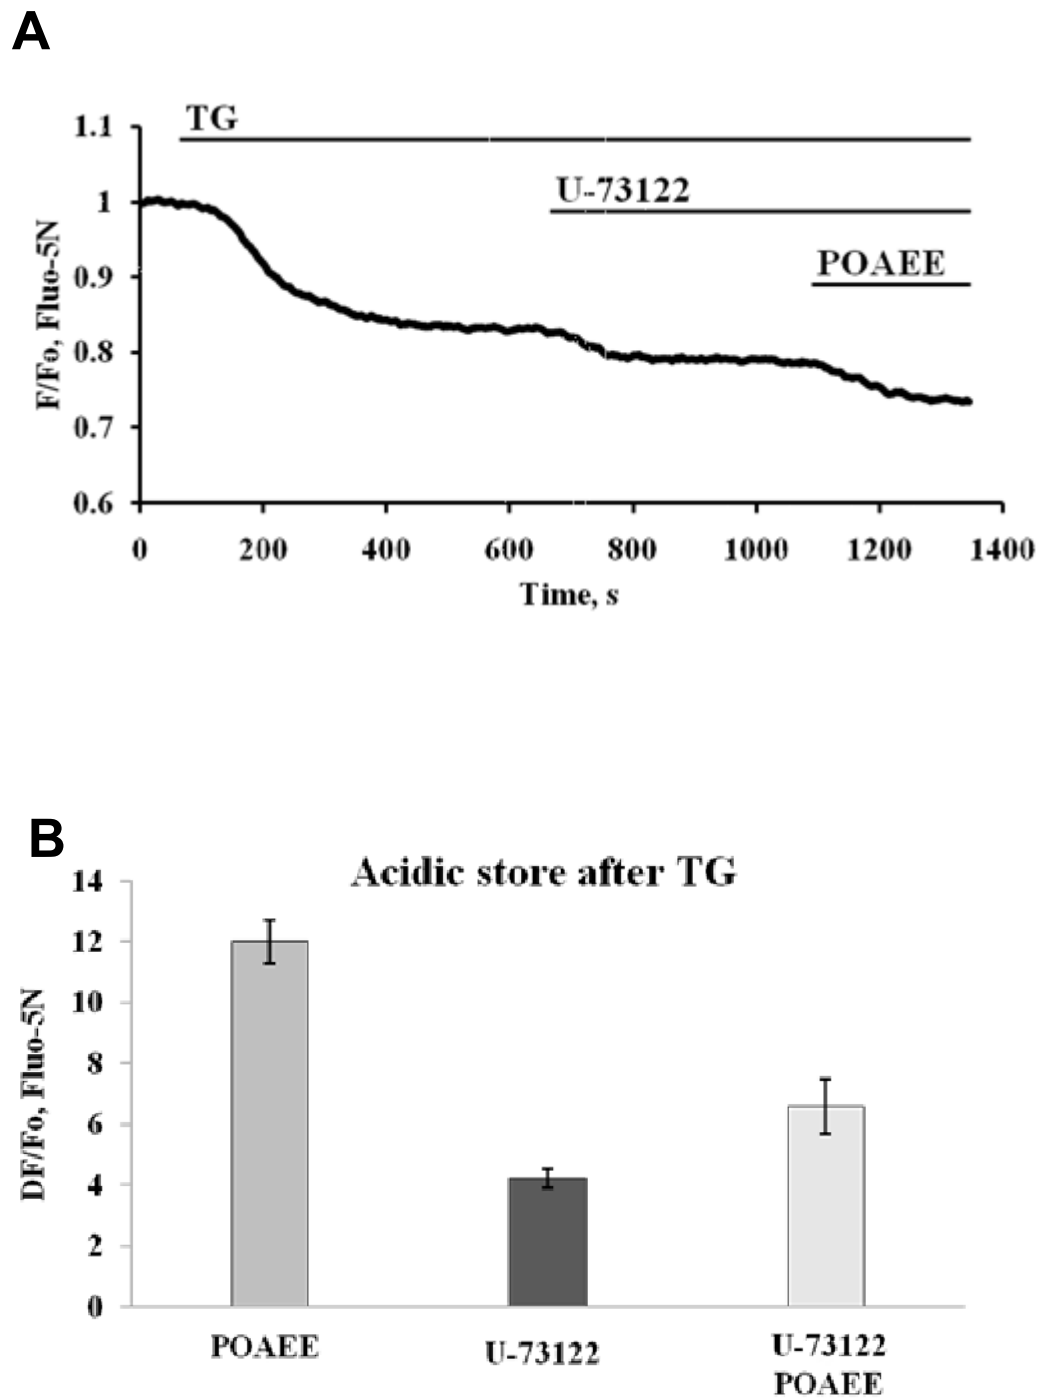

**Fig. S3.** The PLC inhibitor U73122 (10  $\mu$ M) does not abolish POAEE-elicited  $\text{Ca}^{2+}$  release from the acid stores, but releases  $\text{Ca}^{2+}$  itself and then reduces the subsequent POAEE-induced  $\text{Ca}^{2+}$  release. (A) shows a typical trace. Thapsigargin induces the usual reduction in  $[\text{Ca}^{2+}]_{\text{store}}$ . After a plateau has been reached, U73122 causes a further reduction in  $[\text{Ca}^{2+}]_{\text{store}}$ , but thereafter POAEE (100  $\mu$ M) is still capable of eliciting further  $\text{Ca}^{2+}$  release. (B) summarizes the data obtained.

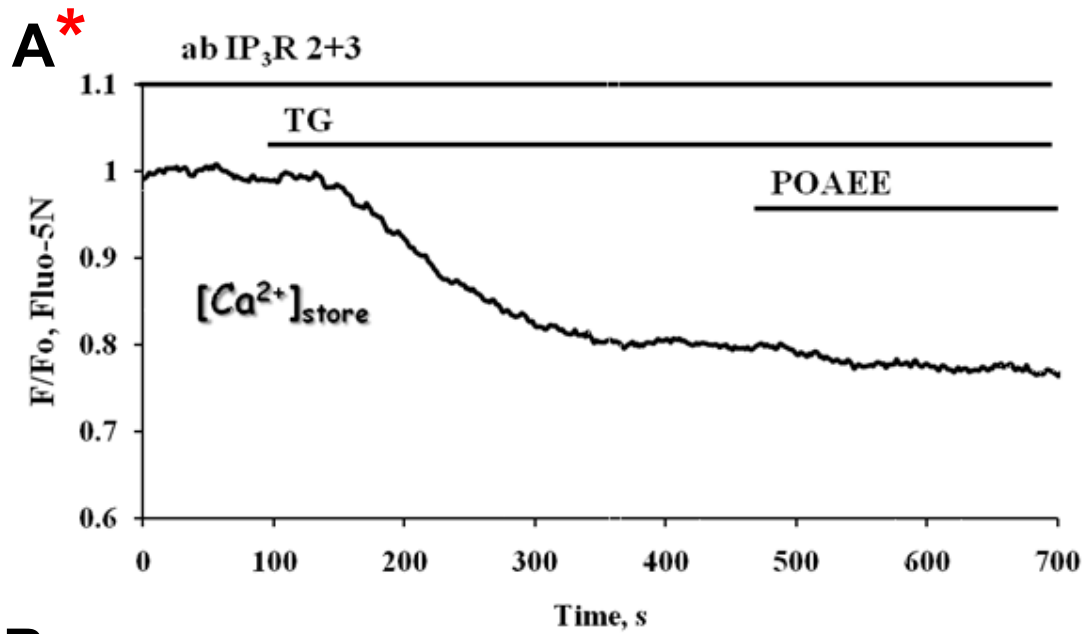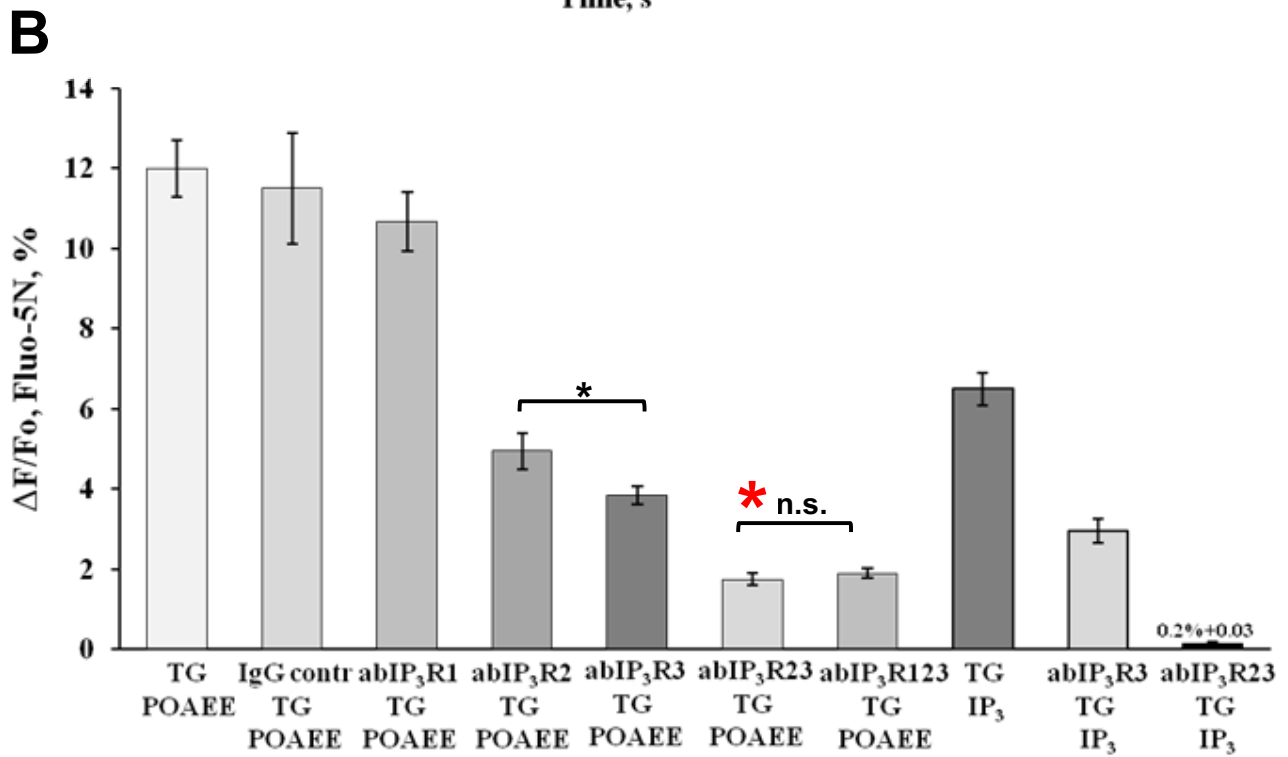

**Fig. S4.** Ca<sup>2+</sup> release from acid stores induced by POAEE or IP<sub>3</sub> depend mainly on type 2 and 3 IP<sub>3</sub>R. (A) POAEE only elicited a tiny reduction in [Ca<sup>2+</sup>]<sub>acid store</sub> in presence of antibodies against type 2 and 3 IP<sub>3</sub>R. (B) Summary of results concerning effects of antibodies against IP<sub>3</sub>R of subtypes 1, 2, and 3, alone or in combinations, on POAEE- and IP<sub>3</sub>-elicited reductions in [Ca<sup>2+</sup>] in the acid store (mean + SEM, *n* = 4–6 in each case).

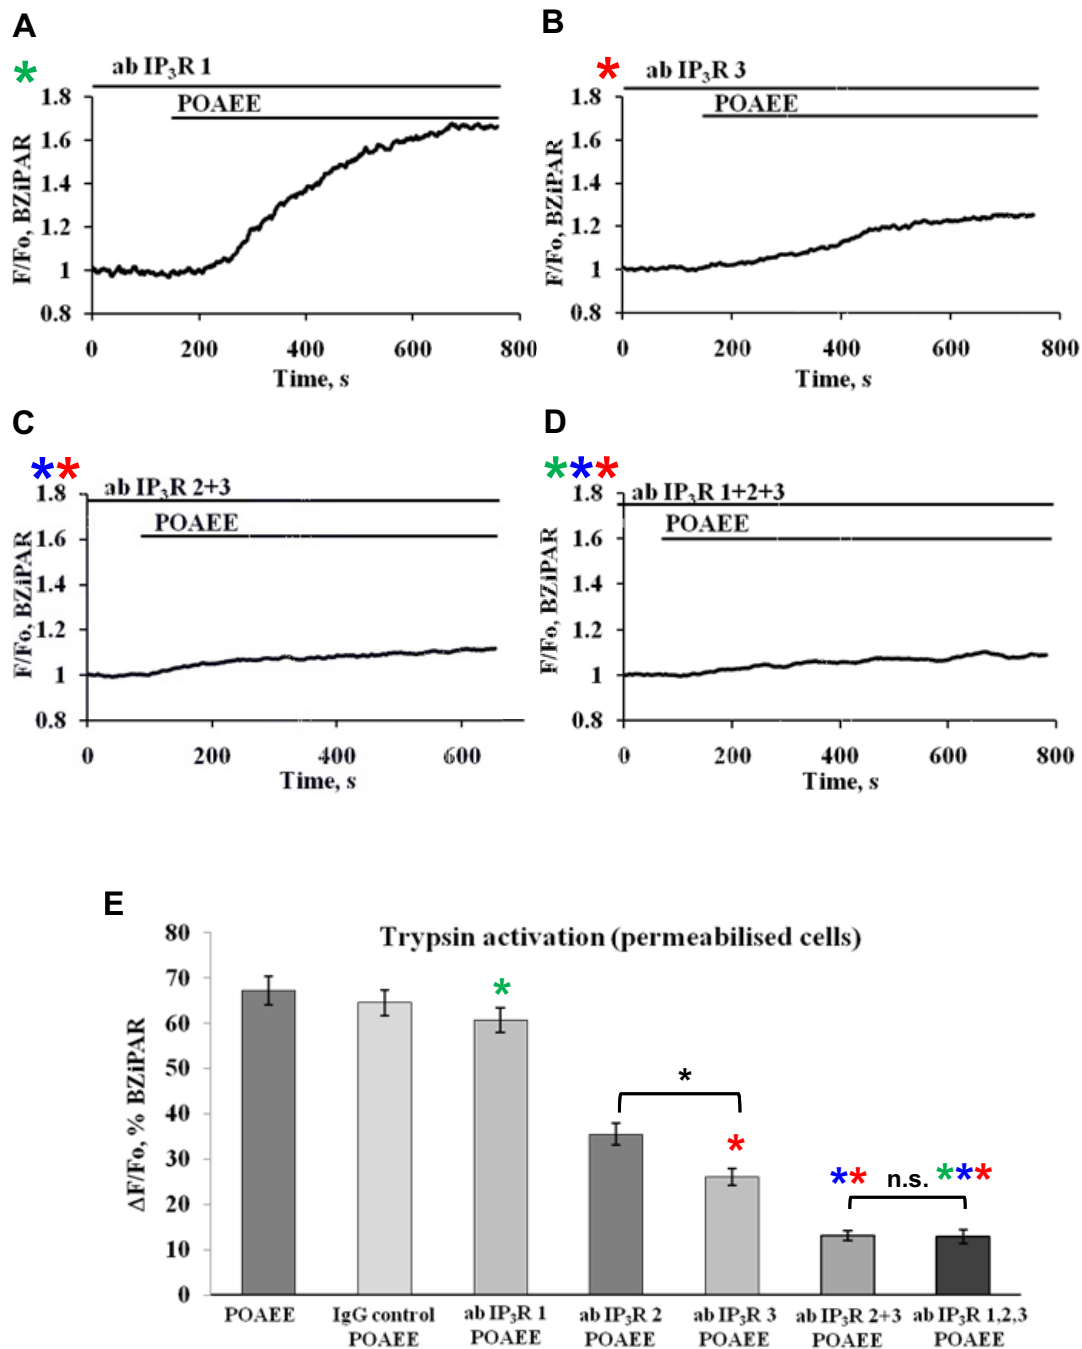

**Fig. S5.** POAEE-elicited trypsin activation depends on  $\text{Ca}^{2+}$  release from acidic stores through type 2 and 3  $\text{IP}_3$ Rs. (A) Normal POAEE-elicited trypsin activation in presence of antibodies against type 1  $\text{IP}_3$ Rs [similar to control, (E)]. (B) POAEE-elicited trypsin activation in presence of antibodies against type 3  $\text{IP}_3$ Rs is markedly reduced compared to control (see E). (C) POAEE only evoked severely reduced trypsin activation in presence of antibodies against type 2 and 3  $\text{IP}_3$ Rs [for quantification and comparison to control, see (E)]. (D) Antibodies against types 1, 2, and 3  $\text{IP}_3$ Rs had same effect as antibodies to types 2 and 3 [see (C) and (E) for comparisons]. (E) Summary of data concerning effects of various antibodies against types 1, 2, or 3  $\text{IP}_3$ Rs, alone or in combination, together with controls, on POAEE-elicited trypsin activation (mean  $\pm$  SEM,  $n = 5-6$  in each case).
